# Supplementary material for: Combination of photoinduced copper(i) catalyzed click chemistry and photosol–gel reaction for the synthesis of hybrid materials
Source: Royal Society of Chemistry journal article supplement (doi:10.1039/c6py01495j), 2016-01-01
Supplement: c6py01495j1.pdf [file c6py01495j1.pdf]

## Supporting Information

### **Combination of photoinduced copper (I) catalyzed click chemistry and photosol-gel reaction for the synthesis of hybrid materials**

**E. Maetz<sup>a</sup>, C. Croutxé-Barghorn<sup>a\*</sup>, C. Delaite<sup>a</sup>, X. Allonas<sup>a</sup>**

<sup>a</sup> *Laboratory of Macromolecular Photochemistry and Engineering, University of Haute-Alsace, 3 rue Alfred Werner, 68093 Mulhouse Cedex, France. Fax: +33(0)389335014; Tel: +33(0)389335017; Email: celine.croutxe-barghorn@uha.fr (C. Croutxe-Barghorn)*

24/08/2016

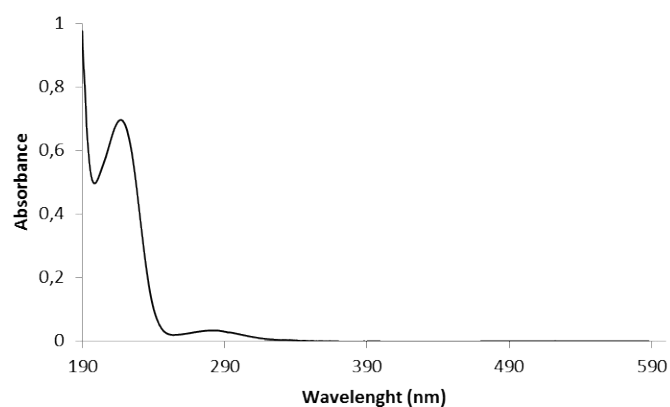

**Fig. S1** Absorption spectrum of ethyl 2-azidopropionate in acetonitrile (concentration:  $1 \cdot 10^{-3} \text{ mol.L}^{-1}$ ).

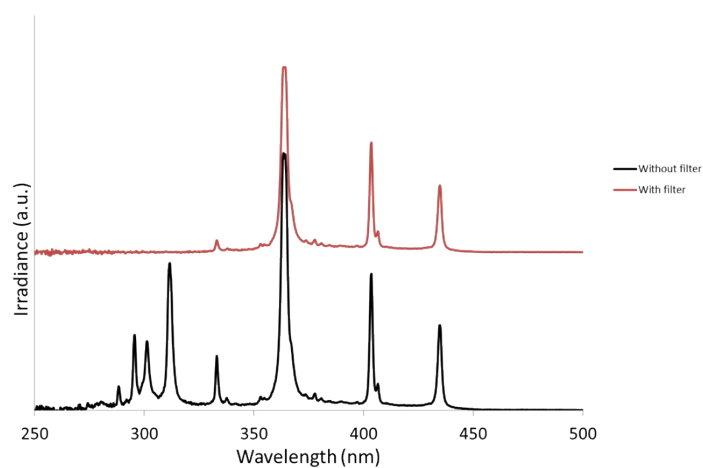

**Fig. S2** Emission spectrum of Hg-Xe lamp equipped with a 365 nm reflector, with and without borosilicate glass plate used as cutoff filter.

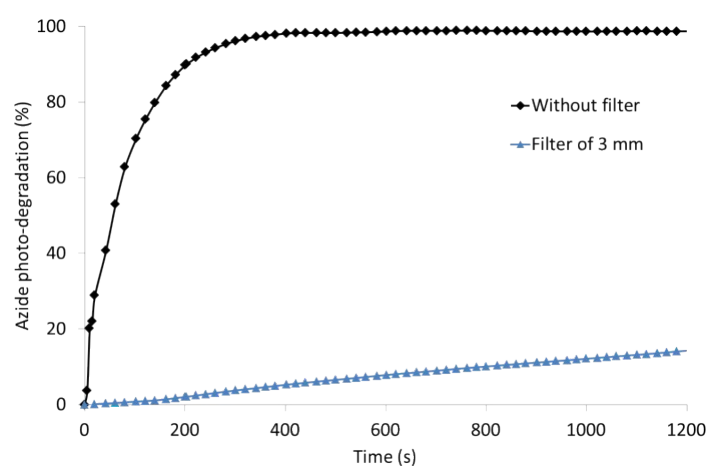

**Fig. S3** Photodegradation of ethyl 2-azidopropionate followed by RT FTIR. The azide precursor was laminated between two  $\text{BaF}_2$  pellets and submitted to UV irradiation with and without borosilicate glass plate cutting all wavelengths below 300 nm.

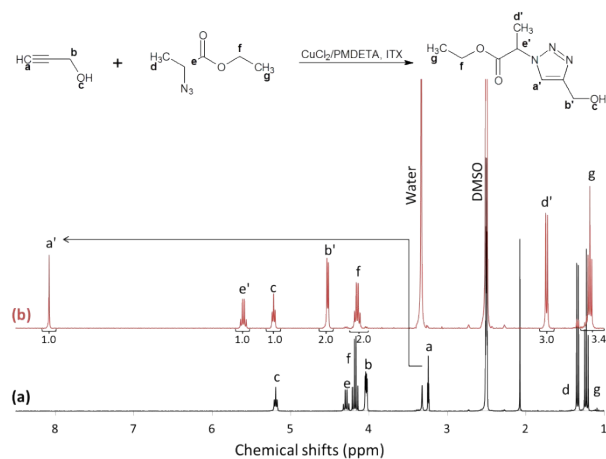

**Fig. S4**  $^1\text{H}$  NMR spectrum in DMSO- $d_6$  of (a) the photoinduced click reaction before irradiation and (b) product of reaction after 20 min of irradiation. (Ethyl 2-azidopropionate/propargyl alcohol 1/1.1 molar ratio, 3.5 wt%  $\text{CuCl}_2/\text{PMDETA}$  and 2.0 wt% ITX).

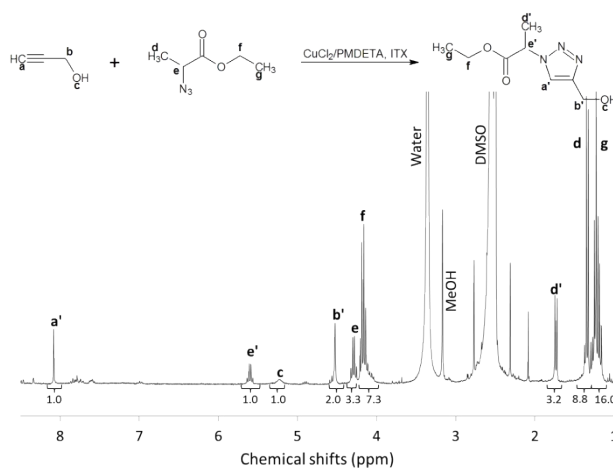

**Fig. S5**  $^1\text{H}$  NMR spectrum in DMSO- $d_6$  of photoinduced click product obtained during the concomitant reaction. (Irradiation: UV conveyor, H lamp, 600  $\text{mW}/\text{cm}^2/\text{pass}$ , 20 passes.)

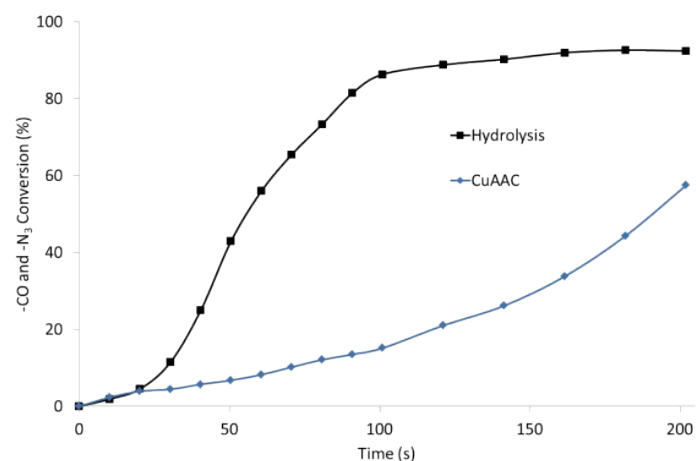

**Fig. S6** Simultaneous sol-gel photopolymerization of PDMOS and photoinduced click reaction followed by RT FTIR under conveyor belt. (PDMOS /ethyl 2-azidopropionate in a ratio of (1/1) wt% , ethyl 2-azidopropionate/propargyl alcohol (1/1.1) molar ratio, 3 wt% of I250, 2 wt% of ITX, 1.5 mol eq. of H<sub>2</sub>O, 55.5 wt% of MeOH and 3.5 wt% of CuCl<sub>2</sub>/PMDETA. Irradiation condition: UV conveyor, H lamp, 600 mW/cm<sup>2</sup>/pass, 20 passes.)
